# Supplementary material
Source: PubMed Central journal article supplement (PMC2837169)
Supplement: emboj2009405s2.pdf [file emboj2009405s2.pdf]

Manuscript EMBO-2009-71765

## **HDAC6 controls autophagosome maturation essential for ubiquitin-selective quality control autophagy**

Joo-Yong Lee, Hiroshi Koga, Yoshiharu Kawaguchi, Waixing Tang, Esther Wong, Ya-sheng Gao, Udai Pandey, Jianrong Lu, Paul Taylor, Ana Maria Cuervo, Susmita Kaushik & Tso-Pang Yao

*Corresponding author: Tso-Pang Yao, Duke University*

---

### **Review timeline:**

Submission date:

29 June 2009

Accepted:

16 December 2009

---

### **Transaction Report:**

(Note: With the exception of the correction of typographical or spelling errors that could be a source of ambiguity, letters and reports are not edited. The original formatting of letters and referee reports may not be reflected in this compilation.)

No Review Process File is available with this article, as the authors have chosen not to make the review process public in this case.
